# Supplementary material
Source: ML conference proceedings conference paper supplement (https://proceedings.neurips.cc/paper_files/paper/2010/hash/68a83eeb494a308fe5295da69428a507-Abstract.html)

# A

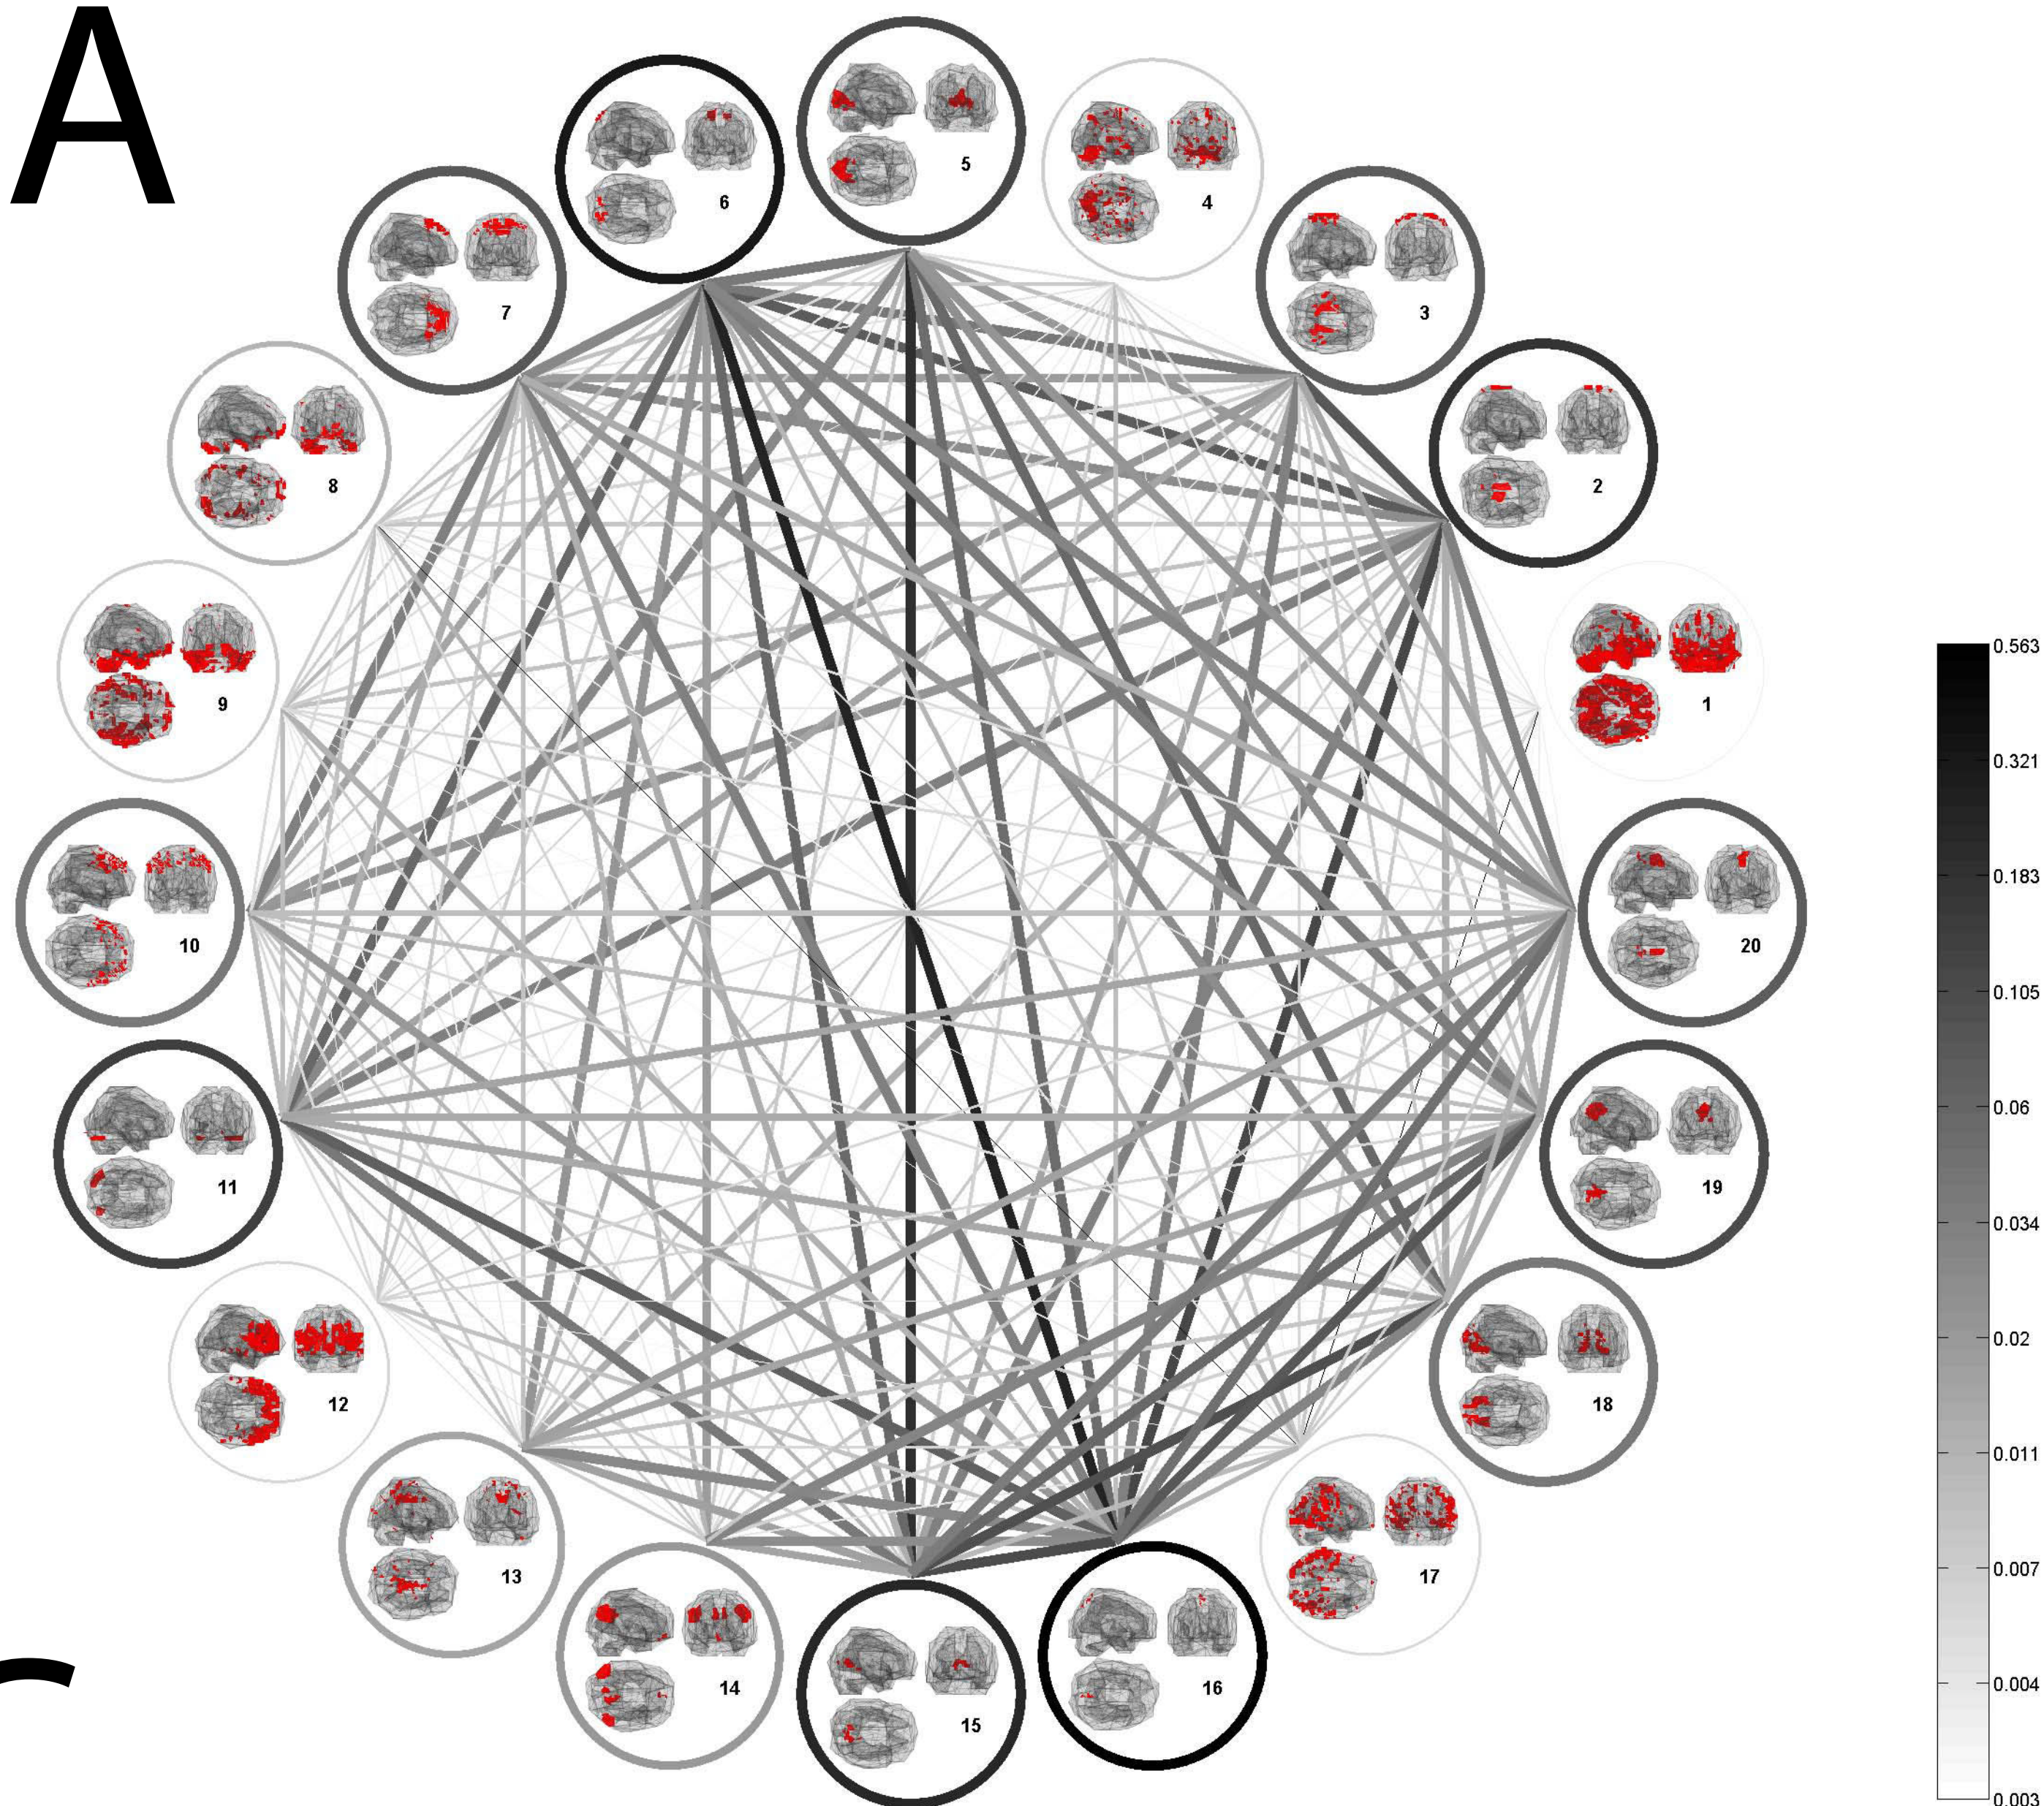

# C

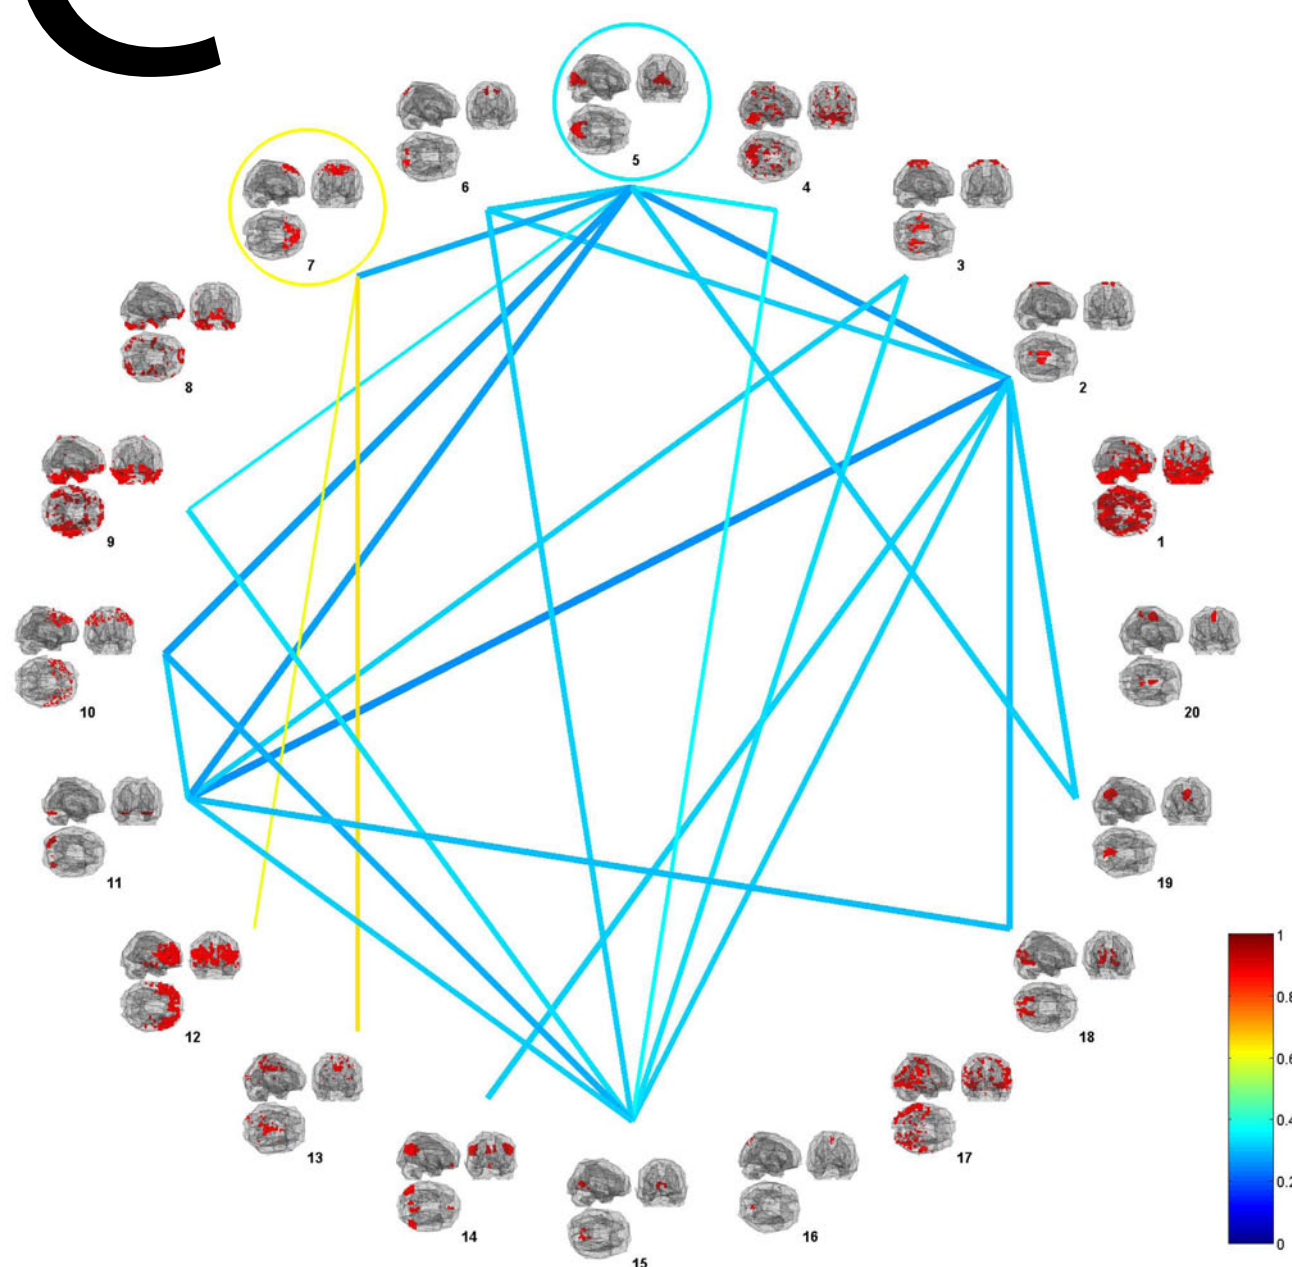

# B

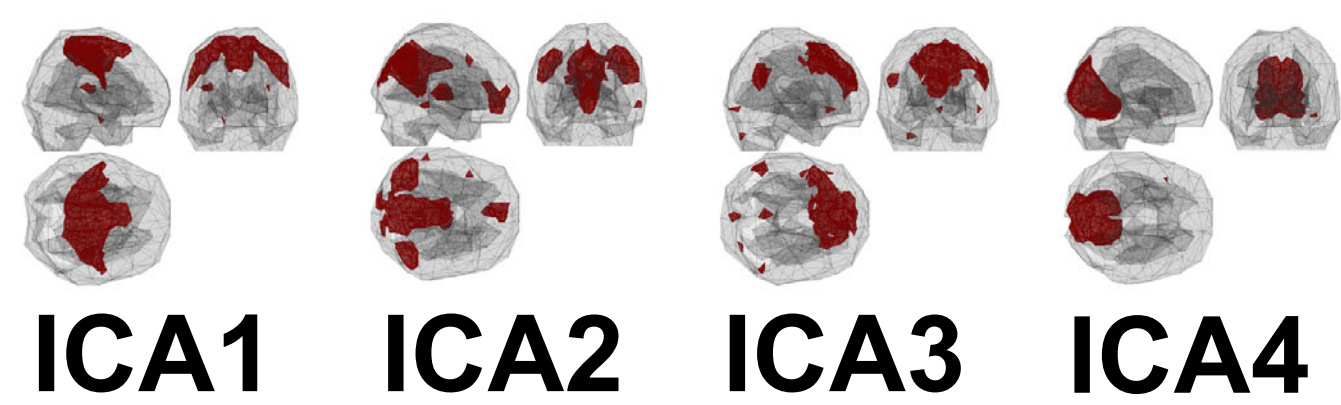

Supplement: Supplementary file [file 68a83eeb494a308fe5295da69428a507-Supplemental.zip]
